# Supplementary material for: Stomatal CO2 responsiveness and photosynthetic capacity of tropical woody species in relation to taxonomy and functional traits
Source: PubMed Central journal article supplement (PMC5408058; doi:10.1007/s00442-017-3829-0), 2017-03-04
Supplement: 442_2017_3829_MOESM2_ESM.pdf [file 442_2017_3829_MOESM2_ESM.pdf]

**Oecologia**  
**Electronic Supplemental Material (ESM)**

**Online Resource 2.** Leaf traits among species and groups (means  $\pm$  CI, 95%;  $g_s$  = stomatal conductance;  $A_{n280}$  = light-saturated net photosynthesis at an intercellular  $[CO_2]$  of 280  $\mu\text{mol mol}^{-1}$ ;  $V_{cmax}$  = maximum rates of photosynthetic carboxylation;  $J_{max}$  = maximum rates of electron transport;  $g_1$  = parameter describing the relationship between photosynthesis and stomatal conductance in combined leaf gas exchange models (see Eq 3); WUE = water use efficiency;  $K_p$  = leaf area-specific plant hydraulic conductance; LMA = leaf mass area;  $g_{smax}$  = maximum stomatal conductance calculated from stomatal density and dimensions;  $N_R$  = fractional leaf N invested in rubisco;  $N_B$  = fractional leaf N invested in bioenergetics;  $N_{LH}$  = fractional leaf N invested in light harvesting).

| Group       | Family           | Species                           | $g_s$ at                            | $g_s$ change at                   | $A_{n280}$                       | $V_{cmax}$                        | $J_{max}$                          | $g_1$                             | WUE                               |
|-------------|------------------|-----------------------------------|-------------------------------------|-----------------------------------|----------------------------------|-----------------------------------|------------------------------------|-----------------------------------|-----------------------------------|
|             |                  |                                   | ambient $[CO_2]$                    | elevated $[CO_2]$                 |                                  |                                   |                                    |                                   |                                   |
| Gymnosperms | Araucariaceae    | <i>Araucaria angustifolia</i>     | 0.047 $\pm$ 0.020                   | -13.1 $\pm$ 10.2                  | 2.4 $\pm$ 1.2                    | 16.1 $\pm$ 4.4                    | n $\pm$ n                          | 4.04 $\pm$ 1.61                   | 3.92 $\pm$ 1.29                   |
|             | Cupressaceae     | <i>Cupressus lusitanica</i>       | 0.181 $\pm$ 0.061                   | -5.4 $\pm$ 7.7                    | 9.8 $\pm$ 1.7                    | 56.4 $\pm$ 6.9                    | 129.2 $\pm$ 19.2                   | 3.44 $\pm$ 0.99                   | 4.46 $\pm$ 0.88                   |
|             | Pinaceae         | <i>Pinus patula</i>               | 0.245 $\pm$ 0.077                   | -10.6 $\pm$ 7.1                   | 14.3 $\pm$ 3.0                   | 70.5 $\pm$ 12.5                   | 131.6 $\pm$ 24.4                   | 4.93 $\pm$ 1.77                   | 4.38 $\pm$ 0.56                   |
|             | Podocarpaceae    | <i>Podocarpus latifolius</i>      | 0.112 $\pm$ 0.032                   | -17.3 $\pm$ 12.1                  | 8.1 $\pm$ 2.2                    | 41.0 $\pm$ 10.0                   | 92.1 $\pm$ 12.0                    | 3.32 $\pm$ 0.49                   | 3.91 $\pm$ 0.28                   |
|             | Podocarpaceae    | <i>Podocarpus falcatus</i>        | 0.081 $\pm$ 0.022                   | -15.8 $\pm$ 16.0                  | 6.6 $\pm$ 1.1                    | 44.7 $\pm$ 10.7                   | 108.2 $\pm$ 21.9                   | 2.25 $\pm$ 0.71                   | 5.29 $\pm$ 0.79                   |
|             |                  | <b>Mean</b>                       | <b>0.133 <math>\pm</math> 0.070</b> | <b>-12.4 <math>\pm</math> 4.1</b> | <b>8.2 <math>\pm</math> 3.8</b>  | <b>45.7 <math>\pm</math> 17.7</b> | <b>115.3 <math>\pm</math> 18.3</b> | <b>3.59 <math>\pm</math> 0.86</b> | <b>4.39 <math>\pm</math> 0.49</b> |
| Monocots    | Arecaceae        | <i>Phoenix reclinata</i>          | 0.089 $\pm$ 0.044                   | -18.8 $\pm$ 17.9                  | 4.2 $\pm$ 2.3                    | 22.1 $\pm$ 10.3                   | 71.2 $\pm$ 23.3                    | 3.49 $\pm$ 2.22                   | 4.15 $\pm$ 1.28                   |
|             | Poaceae          | <i>Dendrocalamus giganteus</i>    | 0.268 $\pm$ 0.083                   | -27.4 $\pm$ 6.2                   | 10.4 $\pm$ 3.5                   | 52.9 $\pm$ 13.5                   | 93.2 $\pm$ 28.2                    | 5.07 $\pm$ 1.83                   | 3.09 $\pm$ 0.26                   |
|             | Poaceae          | <i>Bambusa vulgaris</i>           | 0.134 $\pm$ 0.022                   | -26.2 $\pm$ 8.8                   | 8.3 $\pm$ 0.6                    | 42.7 $\pm$ 5.4                    | 76.5 $\pm$ 10.0                    | 3.60 $\pm$ 0.68                   | 4.09 $\pm$ 0.96                   |
|             | Heliconiaceae    | <i>Heliconia sp.</i>              | 0.215 $\pm$ 0.119                   | -41.7 $\pm$ 8.0                   | 11.0 $\pm$ 3.2                   | 57.1 $\pm$ 10.4                   | 106.1 $\pm$ 15.4                   | 2.43 $\pm$ 0.63                   | 4.92 $\pm$ 1.08                   |
|             | Musaceae         | <i>Musa sapientum</i>             | 0.235 $\pm$ 0.093                   | -32.7 $\pm$ 17.9                  | 16.0 $\pm$ 5.6                   | 82.2 $\pm$ 10.5                   | 171.9 $\pm$ 21.5                   | 2.67 $\pm$ 1.31                   | 7.88 $\pm$ 3.95                   |
|             |                  | <b>Mean</b>                       | <b>0.188 <math>\pm</math> 0.065</b> | <b>-29.4 <math>\pm</math> 7.5</b> | <b>10.0 <math>\pm</math> 3.8</b> | <b>51.4 <math>\pm</math> 19.2</b> | <b>103.8 <math>\pm</math> 35.5</b> | <b>3.45 <math>\pm</math> 0.91</b> | <b>4.83 <math>\pm</math> 1.60</b> |
| Rosids      | Chrysobalanaceae | <i>Macaranga kilimandscharica</i> | 0.167 $\pm$ 0.043                   | -22.2 $\pm$ 3.0                   | 9.6 $\pm$ 3.4                    | 52.5 $\pm$ 13.6                   | 103.8 $\pm$ 19.7                   | 3.56 $\pm$ 0.53                   | 3.94 $\pm$ 0.47                   |
|             | Rosaceae         | <i>Prunus careta</i>              | 0.220 $\pm$ 0.043                   | -17.8 $\pm$ 14.7                  | 10.3 $\pm$ 2.2                   | 49.3 $\pm$ 10.0                   | 95.6 $\pm$ 11.2                    | 5.11 $\pm$ 1.12                   | 3.46 $\pm$ 0.69                   |
|             | Myrtaceae        | <i>Eucalyptus maculata</i>        | 0.138 $\pm$ 0.053                   | -26.3 $\pm$ 7.0                   | 9.4 $\pm$ 2.0                    | 54.1 $\pm$ 8.2                    | 131.7 $\pm$ 26.8                   | 2.54 $\pm$ 0.70                   | 5.25 $\pm$ 0.56                   |
|             | Meliaceae        | <i>Carapa grandiflora</i>         | 0.073 $\pm$ 0.017                   | -24.2 $\pm$ 13.8                  | 6.5 $\pm$ 3.0                    | 34.6 $\pm$ 13.7                   | 84.9 $\pm$ 16.1                    | 3.17 $\pm$ 1.85                   | 4.97 $\pm$ 1.51                   |
|             | Meliaceae        | <i>Cedrela serrate</i>            | 0.126 $\pm$ 0.019                   | -20.2 $\pm$ 10.3                  | 9.9 $\pm$ 1.8                    | 56.3 $\pm$ 11.4                   | 115.8 $\pm$ 17.3                   | 2.49 $\pm$ 0.31                   | 5.98 $\pm$ 1.53                   |
|             | Malvaceae        | <i>Brachychiton acerifolius</i>   | 0.040 $\pm$ 0.011                   | -17.8 $\pm$ 6.2                   | 5.5 $\pm$ 1.6                    | 35.3 $\pm$ 9.0                    | 56.8 $\pm$ 17.3                    | 1.00 $\pm$ 0.42                   | 7.66 $\pm$ 1.41                   |
|             |                  | <b>Mean</b>                       | <b>0.127 <math>\pm</math> 0.052</b> | <b>-21.4 <math>\pm</math> 2.7</b> | <b>8.5 <math>\pm</math> 1.6</b>  | <b>47.0 <math>\pm</math> 7.7</b>  | <b>98.1 <math>\pm</math> 20.7</b>  | <b>2.98 <math>\pm</math> 1.09</b> | <b>5.21 <math>\pm</math> 1.20</b> |
| Asterids    | Bignoniaceae     | <i>Jacaranda mimosifolia</i>      | 0.318 $\pm$ 0.074                   | -20.8 $\pm$ 10.8                  | 9.9 $\pm$ 3.3                    | 68.1 $\pm$ 17.4                   | 138.3 $\pm$ 40.7                   | 6.24 $\pm$ 1.77                   | 2.56 $\pm$ 0.47                   |
|             | Boraginaceae     | <i>Cordia alliodora</i>           | 0.344 $\pm$ 0.265                   | -7.8 $\pm$ 27.8                   | 13.1 $\pm$ 4.4                   | 64.1 $\pm$ 21.8                   | 137.4 $\pm$ 53.7                   | 4.39 $\pm$ 0.86                   | 3.80 $\pm$ 0.62                   |
|             | Oleaceae         | <i>Ligustrum lucidum</i>          | 0.087 $\pm$ 0.041                   | -34.4 $\pm$ 7.1                   | 9.2 $\pm$ 3.5                    | 51.6 $\pm$ 20.2                   | 99.9 $\pm$ 22.7                    | 1.40 $\pm$ 0.67                   | 7.39 $\pm$ 1.04                   |
|             | Solanaceae       | <i>Cyphomandra betaceae</i>       | 0.242 $\pm$ 0.056                   | -21.8 $\pm$ 16.6                  | 19.9 $\pm$ 2.8                   | 96.1 $\pm$ 13.0                   | 201.9 $\pm$ 10.9                   | 2.70 $\pm$ 1.03                   | 4.79 $\pm$ 0.50                   |
|             | Asteraceae       | <i>Tithonia diversifolia</i>      | 0.476 $\pm$ 0.073                   | -18.7 $\pm$ 11.9                  | 26.8 $\pm$ 0.9                   | 128.6 $\pm$ 4.9                   | 188.1 $\pm$ 14.2                   | 4.08 $\pm$ 0.70                   | 4.71 $\pm$ 0.46                   |
|             |                  | <b>Mean</b>                       | <b>0.293 <math>\pm</math> 0.125</b> | <b>-20.7 <math>\pm</math> 8.3</b> | <b>15.8 <math>\pm</math> 6.6</b> | <b>81.7 <math>\pm</math> 27.0</b> | <b>153.1 <math>\pm</math> 36.4</b> | <b>3.76 <math>\pm</math> 1.60</b> | <b>4.65 <math>\pm</math> 1.56</b> |

n = Not measured

**Stomatal CO<sub>2</sub> responsiveness and photosynthetic capacity of tropical woody species in relation to taxonomy and functional traits**

Thomas B. Hasper, Mirindi E. Dusenge, Friederike Breuer, Felicien U. Félicien K. Uwizeye, Göran Wallin, Johan Uddling

Oecologia  
Electronic Supplemental Material (ESM)

Continuation

| Group       | Family           | Species                           | $K_p$<br>(mmol m <sup>-2</sup> s <sup>-1</sup> MPa <sup>-1</sup> ) | Stomata density<br>(stomata mm <sup>-2</sup> ) | Stomatal length<br>(μm) | Wood density<br>(g cm <sup>-3</sup> ) | LMA<br>(g m <sup>-2</sup> ) | $g_{smax}$<br>(mol m <sup>-2</sup> s <sup>-1</sup> ) | $N_R$<br>(%)       | $N_B$<br>(%)       | $N_{LH}$<br>(%)   |
|-------------|------------------|-----------------------------------|--------------------------------------------------------------------|------------------------------------------------|-------------------------|---------------------------------------|-----------------------------|------------------------------------------------------|--------------------|--------------------|-------------------|
| Gymnosperms | Araucariaceae    | <i>Araucaria angustifolia</i>     | 0.78 ± 0.37                                                        | 68.4 ± 3.2                                     | 38.63 ± 2.76            | 0.51 ± 0.03                           | 119.0 ± 18.7                | 1.12 ± 0.09                                          | 5.5 ± 3.6          | n ± n              | 22.9 ± 4.8        |
|             | Cupressaceae     | <i>Cupressus lusitanica</i>       | 1.35 ± 0.68                                                        | 27.0 ± 4.2                                     | 37.58 ± 5.26            | 0.60 ± 0.07                           | 315.9 ± 23.6                | 0.43 ± 0.12                                          | 10.3 ± 1.5         | 2.62 ± 0.49        | 13.9 ± 2.4        |
|             | Pinaceae         | <i>Pinus patula</i>               | 2.12 ± 0.91                                                        | 57.0 ± 2.4                                     | 15.64 ± 3.14            | 0.48 ± 0.05                           | 172.5 ± 10.0                | 0.38 ± 0.04                                          | 19.3 ± 2.7         | 3.79 ± 0.30        | 19.1 ± 8.3        |
|             | Podocarpaceae    | <i>Podocarpus latifolius</i>      | 1.32 ± 0.13                                                        | 131.3 ± 8.2                                    | 36.16 ± 3.61            | 0.58 ± 0.04                           | 141.8 ± 28.2                | 2.01 ± 0.29                                          | 13.1 ± 1.3         | 3.51 ± 0.68        | 17.4 ± 4.9        |
|             | Podocarpaceae    | <i>Podocarpus falcatus</i>        | 0.34 ± 0.09                                                        | 96.4 ± 5.7                                     | 32.98 ± 3.63            | 0.63 ± 0.25                           | 120.7 ± 11.2                | 1.35 ± 0.18                                          | 15.4 ± 3.3         | 4.03 ± 0.76        | 17.1 ± 3.9        |
|             |                  | <b>Mean</b>                       | <b>1.18 ± 0.59</b>                                                 | <b>76.0 ± 34.8</b>                             | <b>32.20 ± 8.33</b>     | <b>0.56 ± 0.05</b>                    | <b>174.0 ± 72.1</b>         | <b>1.06 ± 0.60</b>                                   | <b>12.7 ± 4.6</b>  | <b>3.49 ± 0.61</b> | <b>18.1 ± 2.9</b> |
| Monocots    | Arecaceae        | <i>Phoenix reclinata</i>          | 2.02 ± 1.32                                                        | 174.9 ± 7.0                                    | 16.92 ± 1.83            | 0.47 ± 0.03                           | 144.6 ± 7.6                 | 1.25 ± 0.11                                          | 6.0 ± 2.6          | 2.05 ± 0.60        | 7.5 ± 3.5         |
|             | Poaceae          | <i>Dendrocalamus giganteus</i>    | 4.01 ± 1.85                                                        | 381.0 ± 7.6                                    | 18.19 ± 1.83            | 0.77 ± 0.12                           | 39.6 ± 9.3                  | 2.94 ± 1.18                                          | 26.3 ± 1.7         | 5.24 ± 0.45        | 18.5 ± 3.0        |
|             | Poaceae          | <i>Bambusa vulgaris</i>           | 2.44 ± 0.56                                                        | 57.1 ± 3.5                                     | 18.20 ± 2.83            | 0.60 ± 0.17                           | 47.9 ± 7.5                  | 0.44 ± 0.06                                          | 23.0 ± 1.7         | 4.30 ± 0.46        | 17.1 ± 2.8        |
|             | Heliconiaceae    | <i>Heliconia sp.</i>              | 2.93 ± 0.95                                                        | 171.6 ± 5.0                                    | 25.40 ± 2.18            | n ± n                                 | 60.7 ± 5.0                  | 1.85 ± 0.05                                          | 22.4 ± 2.9         | 4.57 ± 0.54        | 6.2 ± 0.7         |
|             | Musaceae         | <i>Musa sapientum</i>             | 3.70 ± 1.50                                                        | 138.1 ± 3.4                                    | 26.33 ± 3.38            | n ± n                                 | 52.9 ± 10.4                 | 1.54 ± 0.13                                          | 30.7 ± 6.0         | 6.96 ± 0.68        | 7.0 ± 1.3         |
|             |                  | <b>Mean</b>                       | <b>3.02 ± 0.73</b>                                                 | <b>184.5 ± 104.9</b>                           | <b>21.01 ± 3.92</b>     | <b>0.61 ± 0.17</b>                    | <b>69.1 ± 37.6</b>          | <b>1.60 ± 0.80</b>                                   | <b>21.7 ± 8.2</b>  | <b>4.63 ± 1.55</b> | <b>11.2 ± 5.3</b> |
| Rosids      | Chrysobalanaceae | <i>Macaranga kilimandscharica</i> | 4.04 ± 2.32                                                        | 203.1 ± 3.3                                    | 16.19 ± 1.81            | 0.49 ± 0.04                           | 85.3 ± 12.7                 | 1.39 ± 0.50                                          | 18.9 ± 3.6         | 4.67 ± 0.60        | 14.8 ± 2.9        |
|             | Rosaceae         | <i>Prunus careta</i>              | 3.05 ± 0.92                                                        | 228.7 ± 10.2                                   | 26.10 ± 2.24            | 0.72 ± 0.05                           | 98.9 ± 23.3                 | 2.53 ± 0.32                                          | 16.5 ± 1.6         | 3.59 ± 0.31        | 11.1 ± 3.2        |
|             | Myrtaceae        | <i>Eucalyptus maculata</i>        | 1.88 ± 0.81                                                        | 202.1 ± 4.1                                    | 26.27 ± 3.50            | 0.66 ± 0.02                           | 170.6 ± 22.7                | 2.25 ± 0.24                                          | 19.0 ± 3.9         | 4.99 ± 0.46        | 12.8 ± 2.7        |
|             | Meliaceae        | <i>Carapa grandiflora</i>         | 1.74 ± 1.07                                                        | 783.3 ± 5.2                                    | 14.78 ± 2.25            | 0.53 ± 0.05                           | 118.3 ± 13.8                | 4.91 ± 0.66                                          | 11.1 ± 3.6         | 2.69 ± 0.40        | 14.0 ± 2.0        |
|             | Meliaceae        | <i>Cedrela serrate</i>            | 1.94 ± 0.63                                                        | 413.5 ± 6.6                                    | 14.18 ± 1.71            | 0.42 ± 0.03                           | 72.1 ± 7.8                  | 2.48 ± 0.89                                          | 19.8 ± 1.3         | 4.49 ± 0.11        | 12.2 ± 1.5        |
|             | Malvaceae        | <i>Brachychiton acerifolius</i>   | 0.86 ± 0.24                                                        | 184.2 ± 10.8                                   | 28.43 ± 2.62            | 0.42 ± 0.03                           | 92.0 ± 9.9                  | 2.22 ± 0.35                                          | 11.7 ± 3.1         | 2.04 ± 0.56        | 12.5 ± 4.3        |
|             |                  | <b>Mean</b>                       | <b>2.25 ± 0.90</b>                                                 | <b>335.8 ± 188.1</b>                           | <b>20.99 ± 5.28</b>     | <b>0.54 ± 0.10</b>                    | <b>106.2 ± 28.0</b>         | <b>2.63 ± 0.95</b>                                   | <b>16.2 ± 3.1</b>  | <b>3.74 ± 0.95</b> | <b>12.9 ± 1.0</b> |
| Asterids    | Bignoniaceae     | <i>Jacaranda mimosifolia</i>      | 5.28 ± 0.90                                                        | 142.5 ± 3.0                                    | 14.14 ± 2.89            | 0.46 ± 0.04                           | 119.2 ± 26.1                | 0.85 ± 0.07                                          | 17.2 ± 2.6         | 3.76 ± 0.43        | 6.3 ± 2.9         |
|             | Boraginaceae     | <i>Cordia alliodora</i>           | 3.57 ± 0.90                                                        | 135.0 ± 8.6                                    | 22.86 ± 4.03            | 0.44 ± 0.04                           | 62.1 ± 7.3                  | 1.31 ± 0.55                                          | 27.4 ± 7.4         | 6.05 ± 1.66        | 6.1 ± 0.8         |
|             | Oleaceae         | <i>Ligustrum lucidum</i>          | 1.18 ± 0.69                                                        | 308.8 ± 4.9                                    | 21.70 ± 2.03            | 0.56 ± 0.02                           | 106.4 ± 21.3                | 2.84 ± 0.22                                          | 13.0 ± 4.9         | 2.76 ± 0.63        | 13.6 ± 2.5        |
|             | Solanaceae       | <i>Cyphomandra betaceae</i>       | 4.24 ± 1.13                                                        | 136.9 ± 5.9                                    | 36.79 ± 3.71            | 0.09 ± 0.01                           | 63.3 ± 5.0                  | 2.13 ± 0.54                                          | 24.4 ± 4.3         | 5.96 ± 0.60        | 10.0 ± 1.0        |
|             | Asteraceae       | <i>Tithonia diversifolia</i>      | 5.87 ± 1.08                                                        | n ± n                                          | n ± n                   | 0.32 ± 0.08                           | 37.6 ± 4.8                  | n ± n                                                | 51.7 ± 7.0         | 7.96 ± 0.50        | 8.5 ± 2.2         |
|             |                  | <b>Mean</b>                       | <b>4.03 ± 1.60</b>                                                 | <b>180.8 ± 83.7</b>                            | <b>23.87 ± 9.25</b>     | <b>0.37 ± 0.16</b>                    | <b>77.7 ± 29.7</b>          | <b>1.78 ± 0.86</b>                                   | <b>26.7 ± 13.2</b> | <b>5.30 ± 1.80</b> | <b>8.9 ± 2.7</b>  |

n = Not measured

**Stomatal CO<sub>2</sub> responsiveness and photosynthetic capacity of tropical woody species in relation to taxonomy and functional traits**

Thomas B. Hasper, Mirindi E. Dusenge, Friederike Breuer, Felicien U. Félicien K. Uwizeye, Göran Wallin, Johan Uddling
