# Supplementary material for: Stomatal CO2 responsiveness and photosynthetic capacity of tropical woody species in relation to taxonomy and functional traits
Source: PubMed Central journal article supplement (PMC5408058; doi:10.1007/s00442-017-3829-0), 2017-03-04
Supplement: 442_2017_3829_MOESM3_ESM.pdf [file 442_2017_3829_MOESM3_ESM.pdf]

Electronic Supplemental Material (ESM)

**Online Resource 3.** Photosynthetic capacity (i.e.  $V_{cmax}$  and  $J_{max}$ ) in relation to (a) mass-based leaf N concentration ( $N_m$ ) and (b) mass-based leaf P concentration ( $P_m$ ). Regression lines with  $r^2$  and  $P$  values are shown.

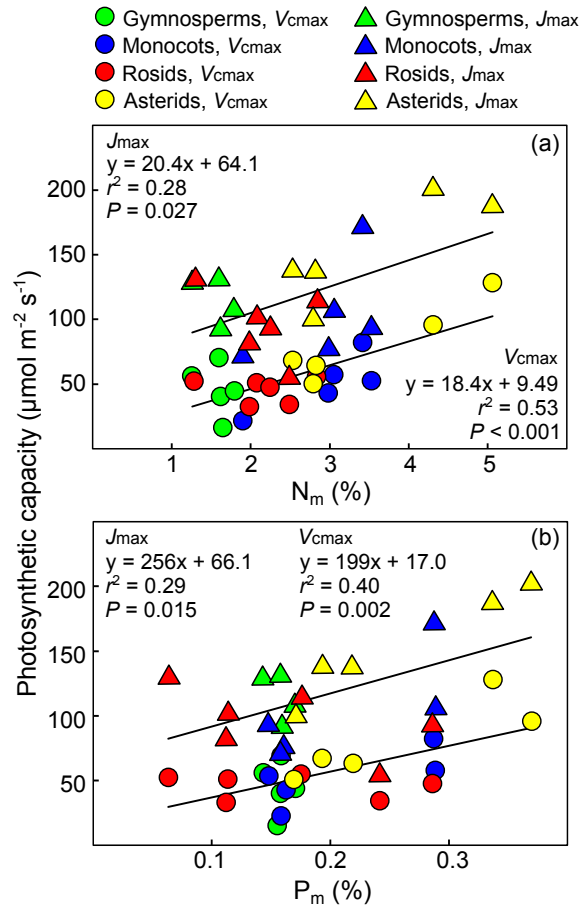

**Stomatal  $\text{CO}_2$  responsiveness and photosynthetic capacity of tropical woody species in relation to taxonomy and functional traits**

Thomas B. Hasper, Mirindi E. Dusenge, Friederike Breuer, Felicien U. Félicien K. Uwizeye, Göran Wallin, Johan Uddling
