# Supplementary material for: Stomatal CO2 responsiveness and photosynthetic capacity of tropical woody species in relation to taxonomy and functional traits
Source: PubMed Central journal article supplement (PMC5408058; doi:10.1007/s00442-017-3829-0), 2017-03-04
Supplement: 442_2017_3829_MOESM4_ESM.pdf [file 442_2017_3829_MOESM4_ESM.pdf]

## Oecologia

### Electronic Supplemental Material (ESM)

**Online Resource 4.** Photosynthetic N (a) and P (b) use efficiency of different taxonomic groups, expressed as the ratio of light-saturated net photosynthetic rate at 280  $\mu\text{mol mol}^{-1}$  intercellular  $[\text{CO}_2]$  ( $A_{n280}$ ) to area-based leaf N and P content, respectively. Each data point represents the mean value of a species and thick black lines represent mean values of the taxonomic groups. GYM, gymnosperms; MON, monocots; ROS, rosids; and AST, asterids.

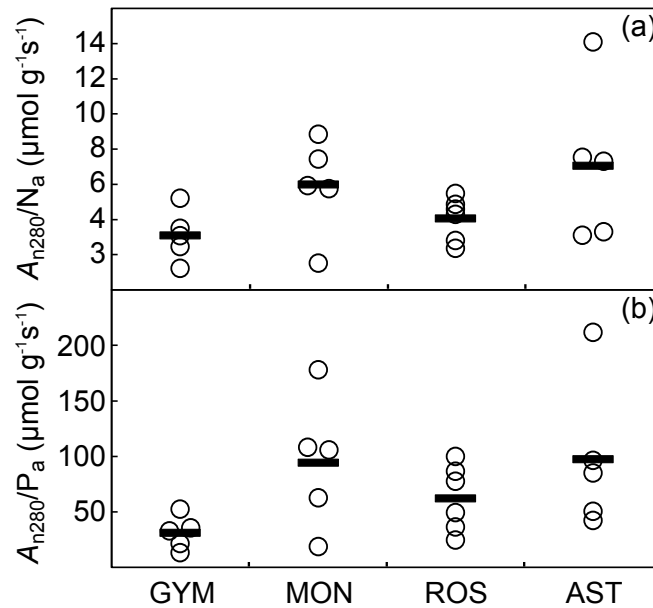

### Stomatal $\text{CO}_2$ responsiveness and photosynthetic capacity of tropical woody species in relation to taxonomy and functional traits

Thomas B. Hasper, Mirindi E. Dusenge, Friederike Breuer, Felicien U. Félicien K. Uwizeye, Göran Wallin, Johan Uddling
