# Supplementary material for: Stomatal CO2 responsiveness and photosynthetic capacity of tropical woody species in relation to taxonomy and functional traits
Source: PubMed Central journal article supplement (PMC5408058; doi:10.1007/s00442-017-3829-0), 2017-03-04
Supplement: 442_2017_3829_MOESM5_ESM.pdf [file 442_2017_3829_MOESM5_ESM.pdf]

## Oecologia

### Electronic Supplemental Material (ESM)

**Online Resource 5.** The relationship between the maximum rates of photosynthetic carboxylation ( $V_{\text{cmax}}$ ) and electron transport ( $J_{\text{max}}$ ) at 25 °C. Regression line with  $r^2$  and  $P$  values is shown.

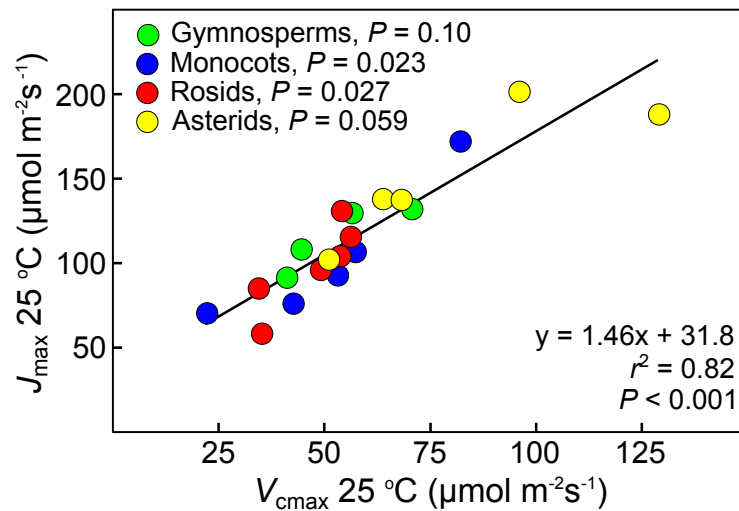

### Stomatal CO<sub>2</sub> responsiveness and photosynthetic capacity of tropical woody species in relation to taxonomy and functional traits

Thomas B. Hasper, Mirindi E. Dusenge, Friederike Breuer, Felicien U. Félicien K. Uwizeye, Göran Wallin, Johan Uddling
